# Supplementary material
Source: ML conference proceedings conference paper supplement (https://openaccess.thecvf.com/content/WACV2021/html/Niinuma_Synthetic_Expressions_Are_WACV_2021_paper.html)
Supplement: Supplementary file 1 [file Niinuma_Synthetic_Expressions_Are_WACV_2021_supplemental.zip]

Archive with 2 entries (2 files):
- 0141-supp.mp4
- 0141-supp.pdf
